# Supplementary material for: Prediction of Alzheimer's disease dementia with MRI beyond the short-term: Implications for the design of predictive models
Source: PubMed Central journal article supplement — Neuroimage Clin. 2019 Apr 30;23:101837. doi: 10.1016/j.nicl.2019.101837 (PMC6515129; doi:10.1016/j.nicl.2019.101837), 2019-04-30
Supplement: mmc1.pdf [file mmc1.pdf]

**Supplementary Table 1.** Demographic information of the total sample at 3 and 4-year follow-up.

| <b>Study</b> | <b>Diagnostic Group</b> | <b>Number</b> | <b>Gender (M/F)</b> | <b>Age (years)</b> | <b>MMSE Score</b> | <b>APOE <math>\epsilon</math>4 (Heterozygote / Homozygote)</b> |
|--------------|-------------------------|---------------|---------------------|--------------------|-------------------|----------------------------------------------------------------|
| ADNI1        | sMCI-3y                 | 100           | 68/32               | 74.4 [55-88]       | 28 [24-30]        | 37/4                                                           |
|              | pMCI-3y                 | 108           | 59/49               | 75.0 [56-88]       | 27 [23-30]        | 59/20                                                          |
|              | sMCI-4y                 | 56            | 41/15               | 74.9 [60-86]       | 28 [24-30]        | 22/2                                                           |
|              | pMCI-4y                 | 122           | 69/53               | 74.6 [55-88]       | 27 [23-30]        | 64/21                                                          |
| ADNIGO/2     | sMCI-3y                 | 52            | 27/25               | 70.6 [55-85]       | 28.5 [25-30]      | 15/5                                                           |
|              | pMCI-3y                 | 48            | 27/21               | 73.0 [57-85]       | 26 [24-30]        | 24/10                                                          |
|              | sMCI-4y                 | 39            | 20/19               | 71.0 [55-85]       | 29 [25-30]        | 13/3                                                           |
|              | pMCI-4y                 | 51            | 28/23               | 72.7 [57-85]       | 27 [24-30]        | 25/10                                                          |

**Model Equations.** Model equations for ADNI1 (1.5T) and ADNIGO/2 (3T) of hippocampus, entorhinal cortex and MRI combined models. The derived index has the following structure

$$\mu = a_0 + a_1 \cdot Age + a_2 \cdot TIV + a_3 \cdot HC + a_4 \cdot Ento$$

where Age stands for patient age in years, TIV as total intracranial volume in liters, HC is the hippocampal volume in  $mm^3$  and Ento is the entorhinal cortex volume in  $mm^3$ .  $a_i$  are the coefficients for each model. A patient is classified as non-AD if  $\mu \leq t$ , being  $t$  the threshold derived by requiring 85% sensitivity in mild AD detection. All these parameters are presented in the following table:

| Model                | $a_0$            | $a_1$               | $a_2$            | $a_3$                | $a_4$                | $t$                 |
|----------------------|------------------|---------------------|------------------|----------------------|----------------------|---------------------|
| Hippocampus (1.5T)   | 16,5540200293699 | -0,125098962265963  | 4,90075950015938 | -0,00218579393149564 |                      | -0,189493300236705  |
| Hippocampus (3T)     | 15,0083668957070 | -0,109003838384900  | 5,94285958979306 | -0,00228561258743557 |                      | -0,1288841986170784 |
| Entorhinal C. (1.5T) | 9,78924572370382 | -0,0733882412558537 | 4,06286198139163 |                      | -0,00306863312750679 | -0,206346173072900  |
| Entorhinal C. (3T)   | 3,79931957433598 | -0,0297481699372104 | 6,99499129948445 |                      | -0,00340811929972149 | -0,390072193310068  |
| MRI model (1.5T)     | 17,6867818108503 | -0,128584764860547  | 6,23975126435520 | -0,00156931758995348 | -0,00202264730414833 | 0,0820047210224786  |
| MRI model (3T)       | 15,8173032270286 | -0,122034153919801  | 9,30690418085413 | -0,00180448281018123 | -0,00228877290486069 | -0,167674233421213  |

## MCI classification with sMRI

### ADNI 1

**Supplementary Table 2.** AUC, Sensitivity and Specificity for ADNI1 MCI participants at 2-5-year follow-up.

| Biomarker     | AUC<br>(% [95%CI]) |            | Sensitivity<br>(% [95%CI]) |            | Specificity<br>(% [95%CI]) |            |
|---------------|--------------------|------------|----------------------------|------------|----------------------------|------------|
|               | 2y                 | 3y         | 2y                         | 3y         | 2y                         | 3y         |
| Hippocampus   | 72 [65-78]         | 73 [66-79] | 86 [78-93]                 | 81 [73-88] | 49 [40-58]                 | 52 [42-62] |
| Entorhinal C. | 70 [63-76]         | 74 [67-80] | 76 [66-85]                 | 77 [68-84] | 52 [43-61]                 | 59 [49-69] |
| MRI Model     | 73 [66-78]         | 76 [70-82] | 81 [71-88]                 | 79 [70-86] | 57 [48-65]                 | 64 [54-73] |

| Biomarker     | AUC<br>(% [95%CI]) |            | Sensitivity<br>(% [95%CI]) |            | Specificity<br>(% [95%CI]) |            |
|---------------|--------------------|------------|----------------------------|------------|----------------------------|------------|
|               | 4y                 | 5y         | 4y                         | 5y         | 4y                         | 5y         |
| Hippocampus   | 78 [71-83]         | 80 [74-86] | 80 [72-87]                 | 80 [72-87] | 61 [47-74]                 | 64 [48-77] |
| Entorhinal C. | 79 [72-85]         | 81 [75-87] | 75 [67-83]                 | 76 [67-83] | 66 [52-78]                 | 72 [57-84] |
| MRI Model     | 81 [75-87]         | 84 [78-90] | 77 [66-84]                 | 77 [69-84] | 71 [58-83]                 | 74 [60-86] |

**Supplementary Table 3. (Subanalysis 1)** Proportions of correctly classified [95%CI] short and mid-term ADNI1 MCI converters for each sMRI model.

| Converter type \ Model | Hippocampus<br>(% [95%CI]) | Entorhinal Cortex<br>(% [95%CI]) | MRI model<br>(% [95%CI]) |
|------------------------|----------------------------|----------------------------------|--------------------------|
| Short-term             | 86 [78-93]                 | 76 [66-85]                       | 81 [71-88]               |
| Mid-term               | 65 [48-80]                 | 76 [59-88]                       | 68 [50-82]               |

**Supplementary Table 4. (Subanalysis 2)** Proportions of correctly classified [95%CI] stable ADNI1 MCI with follow-up times shorter than 5 years for each sMRI model versus stable over 5 years.

| sMCI type \ Model | Hippocampus<br>(% [95%CI]) | Entorhinal Cortex<br>(% [95%CI]) | MRI model<br>(% [95%CI]) |
|-------------------|----------------------------|----------------------------------|--------------------------|
| < 5 years         | 41 [31-52]                 | 41 [31-52]                       | 47 [36-58]               |
| 5 years           | 64 [48-77]                 | 72 [57-84]                       | 74 [60-86]               |

**Supplementary Table 5. (Subanalysis 3)** AUCs for the comparison between ADNI1 sMCI during at least 5 years (excluding those sMCI stable during at least 5 years) and short-term MCI converters and the comparison between sMCI during at least 5 years (excluding those sMCI stable during at least 5 years) and mid-term MCI.

| Comparison \ Model | Hippocampus (% [95%CI]) | Entorhinal Cortex (% [95%CI]) | MRI model (% [95%CI]) |
|--------------------|-------------------------|-------------------------------|-----------------------|
| Short-term         | 83 [76-89]              | 82 [74-88]                    | 85 [79-92]            |
| Mid-term           | 74 [64-83]              | 81 [72-91]                    | 82 [74-91]            |

## ADNI2

**Supplementary Table 6.** AUC, Sensitivity and Specificity for ADNI2 MCI participants at 2-5-year follow-up.

| Biomarker     | AUC (% [95%CI]) |            | Sensitivity (% [95%CI]) |            | Specificity (% [95%CI]) |            |
|---------------|-----------------|------------|-------------------------|------------|-------------------------|------------|
|               | 2y              | 3y         | 2y                      | 3y         | 2y                      | 3y         |
| Hippocampus   | 74 [64-82]      | 74 [64-82] | 77 [62-88]              | 77 [63-88] | 51 [39-64]              | 56 [41-70] |
| Entorhinal C. | 68 [58-76]      | 70 [60-79] | 80 [65-90]              | 81 [67-91] | 44 [31-57]              | 46 [32-60] |
| MRI Model     | 74 [64-82]      | 76 [66-84] | 82 [67-92]              | 81 [67-91] | 55 [42-67]              | 58 [43-71] |

| Biomarker     | AUC (% [95%CI]) |            | Sensitivity (% [95%CI]) |            | Specificity (% [95%CI]) |            |
|---------------|-----------------|------------|-------------------------|------------|-------------------------|------------|
|               | 4y              | 5y         | 4y                      | 5y         | 4y                      | 5y         |
| Hippocampus   | 78 [68-86]      | 79 [68-88] | 76 [62-87]              | 76 [62-87] | 62 [45-77]              | 62 [41-81] |
| Entorhinal C. | 70 [60-80]      | 73 [62-83] | 82 [69-92]              | 82 [69-92] | 49 [32-65]              | 54 [33-74] |
| MRI Model     | 78 [68-86]      | 80 [69-88] | 80 [67-90]              | 80 [67-90] | 62 [45-77]              | 67 [45-84] |

**Supplementary Table 7. (Subanalysis 1)** Proportions of correctly classified [95%CI] short and mid-term ADNI2 MCI converters for each sMRI model.

| Converter type \ Model | Hippocampus (% [95%CI]) | Entorhinal Cortex (% [95%CI]) | MRI model (% [95%CI]) |
|------------------------|-------------------------|-------------------------------|-----------------------|
| Short-term             | 77 [62-88]              | 80 [65-90]                    | 82 [67-92]            |
| Mid-term               | 71 [29-96]              | 100 [59-100]                  | 71 [29-96]            |

**Supplementary Table 8. (Subanalysis 2 )** Proportions of correctly classified [95%CI] stable ADNI2 MCI with follow-up times shorter than 5 years for each sMRI model versus stable over 5 years.

| <b>sMCI type \ Model</b> | <b>Hippocampus (% [95%CI])</b> | <b>Entorhinal Cortex (% [95%CI])</b> | <b>MRI model (% [95%CI])</b> |
|--------------------------|--------------------------------|--------------------------------------|------------------------------|
| < 5 years                | 45 [29-62]                     | 38 [23-54]                           | 48 [38-56]                   |
| 5 years                  | 62 [41-81]                     | 54 [33-74]                           | 67 [45-84]                   |

**Supplementary Table 9. (Subanalysis 3)** AUCs for the comparison between ADNI2 sMCI during at least 5 years (excluding those sMCI stable during at least 5 years) and short-term MCI converters and the comparison between sMCI during at least 5 years (excluding those sMCI stable during at least 5 years) and mid-term MCI.

| <b>Comparison \ Model</b> | <b>Hippocampus (% [95%CI])</b> | <b>Entorhinal Cortex (% [95%CI])</b> | <b>MRI model (% [95%CI])</b> |
|---------------------------|--------------------------------|--------------------------------------|------------------------------|
| Short-term                | 81 [69-89]                     | 73 [60-83]                           | 80 [69-92]                   |
| Mid-term                  | 71 [52-85]                     | 76 [59-94]                           | 79 [62-96]                   |

### *Pooled ADNI1 and ADNI2*

**Supplementary Table 10.** Pooled results of Supplementary Tables 8 and 12, along with chi-square p-values of the comparison.

| <b>Converter type \ Model</b> | <b>Hippocampus (% [95%CI])<br/>(p = 0.013)</b> | <b>Entorhinal Cortex (% [95%CI])<br/>(p = 0.77)</b> | <b>MRI model (% [95%CI])<br/>(p=0.072)</b> |
|-------------------------------|------------------------------------------------|-----------------------------------------------------|--------------------------------------------|
| Short-term                    | 83 [76-89]                                     | 77 [69-84]                                          | 81 [73-87]                                 |
| Mid-term                      | 65 [50-79]                                     | 80 [66-90]                                          | 67 [52-80]                                 |

**Supplementary Table 11.** Pooled results of Supplementary Tables 9 and 13, along with chi-square p-values of the comparison.

| <b>sMCI type \ Model</b> | <b>Hippocampus (% [95%CI])<br/>(p = 0.005)</b> | <b>Entorhinal Cortex (% [95%CI])<br/>(p &lt; 0.001)</b> | <b>MRI model (% [95%CI])<br/>(p &lt; 0.001)</b> |
|--------------------------|------------------------------------------------|---------------------------------------------------------|-------------------------------------------------|
| < 5 years                | 43 [34-52]                                     | 40 [32-49]                                              | 47 [38-56]                                      |
| 5 years                  | 63 [51-74]                                     | 66 [54-77]                                              | 71 [60-81]                                      |

**Supplementary Table 12.** Pooled results of Supplementary Tables 10 and 14.

| <b>Model</b><br><b>Comparison</b> | <b>Hippocampus</b><br><b>(% [95%CI])</b> | <b>Entorhinal Cortex</b><br><b>(% [95%CI])</b> | <b>MRI model</b><br><b>(% [95%CI])</b> |
|-----------------------------------|------------------------------------------|------------------------------------------------|----------------------------------------|
| Short-term                        | 82 [76-88]                               | 79 [73-86]                                     | 84 [78-90]                             |
| Mid-term                          | 74 [64-83]                               | 80 [72-88]                                     | 82 [74-89]                             |
